# Supplementary material
Source: HighWire-hosted journal article supplement (https://molpharm.aspetjournals.org/highwire/filestream/77108/field_highwire_adjunct_files/0/supplemental_data.pdf)

## **Supplemental Data**

### **Formation, Reactivity, and Anti-platelet Activity Of Mixed Disulfide Conjugates Of Clopidogrel**

Haoming Zhang, D. Adam Lauver, Benedict R. Lucchesi, Paul F Hollenberg

Department of Pharmacology (HZ, DAL, BRL, PFH), The University of Michigan Medical School,  
Ann Arbor, MI 48109

## **Molecular Pharmacology**

### **Figure Legend**

Supplemental Figure 1. Reduction of the NPT conjugate of clopidogrel by GSH in the presence of either cytosol or boiled cytosol. Boiled cytosol was prepared by heating at 100 °C for 5 min. Other experimental conditions are identical as described in Figure 5. The results clearly show that the reduction of the conjugate by GSH is enhanced by enzymes in cytosol, not by free thiols in cytosol.

Supplemental Figure 1

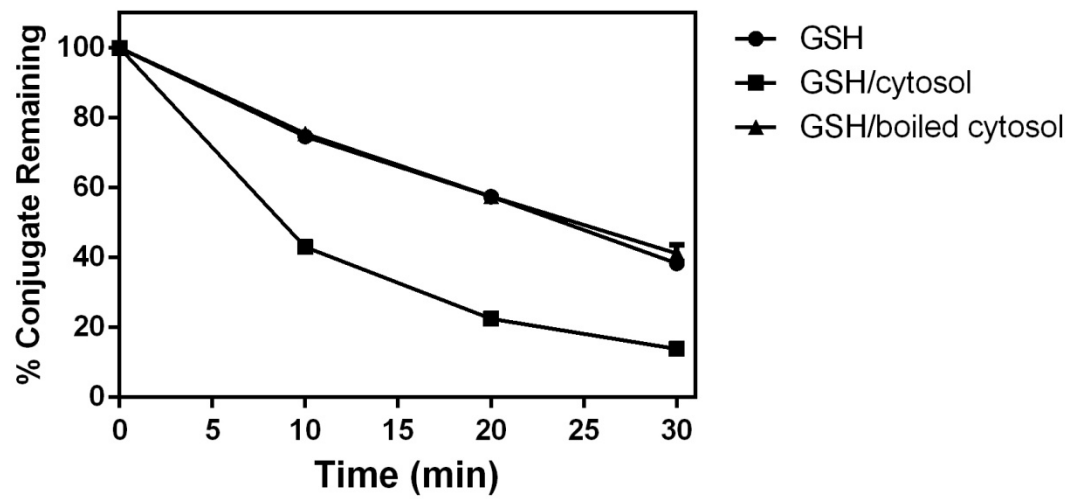

Supplement: supplemental_data.pdf [file supplemental_data.pdf]
